# Supplementary material
Source: Royal Society of Chemistry journal article supplement (https://www.rsc.org/suppdata/dt/1999/3909/907259d.doc)
Supplement: Supplementary file 1 [file 907259d.doc]

**Supplementary Material**

Full description of crystallography

*Crystallography* : A single microcrystal of STA-6, an elongated tetragonal prism 25m wide and 80m long, was examined at the microcrystal diffraction station 9.8 at the synchrotron source at the Daresbury Laboratory. The microcrystal was glued to the end of a fine glass fibre and data collected at room temperature on a three-circle (fixed kappa) Siemens diffractometer fitted with a Siemens SMART CCD detector. The wavelength was calibrated prior to the experiment as 0.6885Å. Data were collected in  steps of 0.4 over 180, with the detector 2 and goniometer circles fixed, and this was repeated for reduced  angular ranges at different  values, to ensure a hemisphere of data was collected. Data were integrated for d-spacings less than 8.4Å and the resolution limit was 0.7Å. Data reduction was carried out using the Bruker AXS SAINT and SADABS packages. Data merging in Laue Group 4/mmm (Rint=0.058) gave a total of 15082 reflections, 1640 of which were unique and 1097 observed (F>4(F)). The basic framework structure was solved in P4/mnc using the SHELXS package and refined using SHELXL11. Full anisotropic refinement in P 4/mnc (a=14.322(2)Å, c=10.424(1)Å) using 62 parameters gave residuals of R1=0.094, wR2(F2)=0.313, for 1097 data (F>4(F)). It was not possible to identify complete template molecules unambiguously from the difference Fourier synthesis, because there will necessarily be disorder as the symmetry of the template is lower than that of the framework. However, if the template positions suggested by molecular modelling are included, allowing for statistical disorder, the residuals are reduced to R1=0.084 and wR2(F2)=29.4. No attempt was made to locate water molecules. Aluminium and phosphorus are strictly ordered within this space group, with Al-O bond lengths between 1.756(5) and 1.777(5)Å and P-O bond lengths between 1.491(4) and 1.521(4)Å. If the structure is refined in the lower symmetry space group P 4nc, which possesses the same extinction conditions as P4/mnc, and the template again included in its modelled position, improved residuals were obtained (R1=0.072, wR2(F2)=25.8 with 109 parameters) but this lead to higher esd's on the bond lengths and angles and bond lengths to one oxygen outside those expected (Al-O 1.797(8)Å, P-O 1.398(8)Å. For this reason the higher symmetry solution is preferred. Powder diffraction of a pure sample of STA-6, ground fine, was performed from 5 to 80o2 on a STOE STADIP diffractometer using Cu K1 monochromated radiation. Rietveld refinement of the data was performed using as a starting model atomic coordinates of the STA-6 framework derived from single crystal diffraction and of the template obtained from modelling studies, and permitting refinement of the framework atom positions (constraining P-O bond lengths to 1.52(2)Å, Al-O to 1.73(4), and O-O distances to 2.50(6) and 2.82(10)Å, depending on whether they belong to PO4 or AlO4 tetrahedra, respectively. This gave an acceptable fit (Supplementary Figure, Rwp=12.8%, Rp=10.2%) for a unit cell a=14.339(1)Å, c=10.443(1)Å. Powder diffraction of STA-6, calcined at 550oC and kept dry, was performed from 5 to 60o2 on a STOE STADIP diffractometer using Cu K1 monochromated radiation. Constrained Rietveld refinement in P4/mnc, with atomic coordinates of the STA-6 framework obtained from the single crystal data as a starting model, and using the same constraints and excluding an impurity peak (21.6-21.9o2), gave an acceptable fit to the experimental data (Rwp=13.7%, Rp=10.8%) and unit cell parameters a=14.282(1)Å, c=10.249(1)Å. Refinement in P4nc gave no improvement in the fit in this case.

**Legend to supplementary figure**

Observed (crosses), simulated(line) and difference (below) powder diffraction profiles of STA-6. The XRD was obtained on a separated fraction of crystals of STA-6, ground fine and loaded and dried at 150oC in a quartz 0.7mm capillary. A STOE STADIP diffractometer operating with a sealed X-ray tube, using monochromated Cu K1 X-radiation, was used in Debye-Scherrer geometry. The structural model for the framework was that obtained by single crystal diffraction, whereas the template position was that obtained by modelling and statistically distributed between closely equivalent sites. Background, instrumental parameters and cell dimensions of STA-6 were allowed to vary. Pseudovoigt peak shapes were used and refined. Only the framework coordinates were permitted to vary, and these were closely constrained to retain sensible geometries of AlO4 and PO4 tetrahedra, as described in the text. (Rwp =12.8, Rp=10.2%)
